# Supplementary material
Source: Research Square preprint supplement (doi:10.21203/rs.3.rs-9706509/v1)

**Supplementary material**

**The barley husk serves as a silicon source for seedling development**

Gabriel de Oliveira Ragazzo1, Yudelsy Antonia Tandron Moya1, Jörg Schaller2, and Nicolaus von Wirén1,*

1 Leibniz Institute of Plant Genetics and Crop Plant Research (IPK), Corrensstr. 3, 06466, Gatersleben, Germany

2 Leibniz Centre for Agricultural Landscape Research (ZALF), Eberswalder Str. 84, 15374, Müncheberg, Germany

* Corresponding author. Email address: [vonwiren@ipk-gatersleben.de](mailto:vonwiren@ipk-gatersleben.de)

**ORCID:**

Gabriel de Oliveira Ragazzo: <https://orcid.org/0000-0003-0643-3475>

Yudelsy Antonia Tandron Moya: <https://orcid.org/0000-0002-7511-0779>

Jörg Schaller: <https://orcid.org/0000-0003-1996-0127>

Nicolaus von Wirén: <https://orcid.org/0000-0002-4966-425X>

**Number of pages: 8**

**Number of figures: 2**

**Number of tables: 1**

**Table S1.** List of barley accessions used for a genome-wide association study on Si concentration in seeds.

| **Accession** | **Annuality** | **Status** | **Origin** | **DOI** | **Si conc.**  **(mg g-1 DW)** |
| --- | --- | --- | --- | --- | --- |
| Golden Promise | Spring type | Cultivar | Scotland | ----- | 1.03 |
| Morex | Spring type | Cultivar | USA | ----- | 0.79 |
| Steptoe | Spring type | Cultivar | USA | ----- | 1.06 |
| HOR 10004 | Spring type | Landrace | Pakistan | [10.25642/IPK/GBIS/25648](https://doi.org/10.25642/IPK/GBIS/25648) | 2.72 |
| HOR 10014 | Spring type | Landrace | Pakistan | [10.25642/IPK/GBIS/25658](https://doi.org/10.25642/IPK/GBIS/25658) | 1.88 |
| HOR 10018 | Spring type | Landrace | Pakistan | [10.25642/IPK/GBIS/25662](https://doi.org/10.25642/IPK/GBIS/25662) | 1.86 |
| HOR 10074 | Spring type | Landrace | Mongolia | [10.25642/IPK/GBIS/25717](https://doi.org/10.25642/IPK/GBIS/25717) | ≤LLOQ |
| HOR 10083 | Spring type | Landrace | Libya | [10.25642/IPK/GBIS/25726](https://doi.org/10.25642/IPK/GBIS/25726) | 2.22 |
| HOR 10157 | Spring type | Landrace | Libya | [10.25642/IPK/GBIS/25799](https://doi.org/10.25642/IPK/GBIS/25799) | 3.44 |
| HOR 10560 | Spring type | Landrace | Italy | [10.25642/IPK/GBIS/26262](https://doi.org/10.25642/IPK/GBIS/26262) | 1.69 |
| HOR 10606 | Spring type | Landrace | Iraq | [10.25642/IPK/GBIS/26308](https://doi.org/10.25642/IPK/GBIS/26308) | 3.58 |
| HOR 10778 | Spring type | Landrace | Italy | [10.25642/IPK/GBIS/80501](https://doi.org/10.25642/IPK/GBIS/80501) | 6.52 |
| HOR 10793 | Spring type | Landrace | Italy | [10.25642/IPK/GBIS/92407](https://doi.org/10.25642/IPK/GBIS/92407) | 1.92 |
| HOR 10843 | Spring type | Landrace | Colombia | [10.25642/IPK/GBIS/75483](https://doi.org/10.25642/IPK/GBIS/75483) | 2.04 |
| HOR 10961 | Spring type | Cultivar | USA | [10.25642/IPK/GBIS/68507](https://doi.org/10.25642/IPK/GBIS/68507) | 0.38 |
| HOR 10983 | Spring type | Landrace | Tunisia | [10.25642/IPK/GBIS/70326](https://doi.org/10.25642/IPK/GBIS/70326) | 2.63 |
| HOR 10984 | Spring type | Landrace | Tunisia | [10.25642/IPK/GBIS/70327](https://doi.org/10.25642/IPK/GBIS/70327) | 2.56 |
| HOR 11016 | Spring type | Cultivar | ----- | [10.25642/IPK/GBIS/70827](https://doi.org/10.25642/IPK/GBIS/70827) | 2.12 |
| HOR 11065 | Spring type | Cultivar | North Korea | [10.25642/IPK/GBIS/71008](https://doi.org/10.25642/IPK/GBIS/71008) | 3.00 |
| HOR 11111 | Spring type | Landrace | Nepal | [10.25642/IPK/GBIS/91234](https://doi.org/10.25642/IPK/GBIS/91234) | 0.07 |
| HOR 11124 | Spring type | Landrace | Italy | [10.25642/IPK/GBIS/81427](https://doi.org/10.25642/IPK/GBIS/81427) | ≤LLOQ |
| HOR 11154 | Spring type | Landrace | North Korea | [10.25642/IPK/GBIS/81893](https://doi.org/10.25642/IPK/GBIS/81893) | ≤LLOQ |
| HOR 11173 | Spring type | Landrace | Tunisia | [10.25642/IPK/GBIS/86318](https://doi.org/10.25642/IPK/GBIS/86318) | 2.26 |
| HOR 11174 | Spring type | Landrace | Tunisia | [10.25642/IPK/GBIS/86319](https://doi.org/10.25642/IPK/GBIS/86319) | 1.60 |
| HOR 11258 | Spring type | Cultivar | Japan | [10.25642/IPK/GBIS/74825](https://doi.org/10.25642/IPK/GBIS/74825) | 3.45 |
| HOR 11298 | Spring type | Cultivar | South Korea | [10.25642/IPK/GBIS/67577](https://doi.org/10.25642/IPK/GBIS/67577) | 3.24 |
| HOR 11318 | Spring type | Landrace | Israel | [10.25642/IPK/GBIS/55937](https://doi.org/10.25642/IPK/GBIS/55937) | 2.67 |
| HOR 11319 | Spring type | Landrace | Greece | [10.25642/IPK/GBIS/55399](https://doi.org/10.25642/IPK/GBIS/55399) | 1.87 |
| HOR 11321 | Spring type | Landrace | Tunisia | [10.25642/IPK/GBIS/50296](https://doi.org/10.25642/IPK/GBIS/50296) | 2.81 |
| HOR 11322 | Spring type | Landrace | Tunisia | [10.25642/IPK/GBIS/56007](https://doi.org/10.25642/IPK/GBIS/56007) | 2.86 |
| HOR 11324 | Spring type | Landrace | Tunisia | [10.25642/IPK/GBIS/59436](https://doi.org/10.25642/IPK/GBIS/59436) | 3.13 |
| HOR 11325 | Spring type | Landrace | Tunisia | [10.25642/IPK/GBIS/90139](https://doi.org/10.25642/IPK/GBIS/90139) | 2.51 |
| HOR 11326 | Spring type | Landrace | Tunisia | [10.25642/IPK/GBIS/59205](https://doi.org/10.25642/IPK/GBIS/59205) | 2.32 |
| HOR 11329 | Spring type | Landrace | Tunisia | [10.25642/IPK/GBIS/59252](https://doi.org/10.25642/IPK/GBIS/59252) | 2.47 |
| HOR 1133 | Spring type | Landrace | France | [10.25642/IPK/GBIS/17334](https://doi.org/10.25642/IPK/GBIS/17334) | 2.85 |
| HOR 11331 | Spring type | Landrace | Tunisia | [10.25642/IPK/GBIS/59257](https://doi.org/10.25642/IPK/GBIS/59257) | 0.81 |
| HOR 11332 | Spring type | Landrace | Tunisia | [10.25642/IPK/GBIS/59456](https://doi.org/10.25642/IPK/GBIS/59456) | 0.24 |
| HOR 11333 | Spring type | Landrace | Tunisia | [10.25642/IPK/GBIS/50329](https://doi.org/10.25642/IPK/GBIS/50329) | 2.93 |
| HOR 11346 | Spring type | Landrace | Tunisia | [10.25642/IPK/GBIS/92309](https://doi.org/10.25642/IPK/GBIS/92309) | 2.49 |
| HOR 11349 | Spring type | Landrace | Tunisia | [10.25642/IPK/GBIS/92211](https://doi.org/10.25642/IPK/GBIS/92211) | 1.90 |
| HOR 11351 | Spring type | Landrace | Tunisia | [10.25642/IPK/GBIS/92212](https://doi.org/10.25642/IPK/GBIS/92212) | 0.31 |
| HOR 11388 | Spring type | Cultivar | ----- | [10.25642/IPK/GBIS/67765](https://doi.org/10.25642/IPK/GBIS/67765) | 6.18 |
| HOR 11400 | Spring type | Landrace | Ethiopia | [10.25642/IPK/GBIS/67777](https://doi.org/10.25642/IPK/GBIS/67777) | 2.31 |
| HOR 11407 | Spring type | Landrace | China | [10.25642/IPK/GBIS/50393](https://doi.org/10.25642/IPK/GBIS/50393) | 0.23 |
| HOR 11419 | Spring type | Landrace | India | [10.25642/IPK/GBIS/56460](https://doi.org/10.25642/IPK/GBIS/56460) | ≤LLOQ |
| HOR 11420 | Spring type | Landrace | India | [10.25642/IPK/GBIS/56461](https://doi.org/10.25642/IPK/GBIS/56461) | 0.09 |
| HOR 11430 | Spring type | Landrace | Peru | [10.25642/IPK/GBIS/56547](https://doi.org/10.25642/IPK/GBIS/56547) | 0.24 |
| HOR 11450 | Spring type | Landrace | USA | [10.25642/IPK/GBIS/56661](https://doi.org/10.25642/IPK/GBIS/56661) | 0.26 |
| HOR 11454 | Spring type | Cultivar | USA | [10.25642/IPK/GBIS/56665](https://doi.org/10.25642/IPK/GBIS/56665) | 0.10 |
| HOR 11491 | Spring type | Landrace | Italy | [10.25642/IPK/GBIS/67678](https://doi.org/10.25642/IPK/GBIS/67678) | 2.76 |
| HOR 11492 | Spring type | Landrace | Italy | [10.25642/IPK/GBIS/67679](https://doi.org/10.25642/IPK/GBIS/67679) | 1.80 |
| HOR 11494 | Spring type | Landrace | Italy | [10.25642/IPK/GBIS/67681](https://doi.org/10.25642/IPK/GBIS/67681) | 1.97 |
| HOR 11496 | Spring type | Landrace | Italy | [10.25642/IPK/GBIS/67683](https://doi.org/10.25642/IPK/GBIS/67683) | 2.03 |
| HOR 11498 | Spring type | Landrace | Italy | [10.25642/IPK/GBIS/67685](https://doi.org/10.25642/IPK/GBIS/67685) | 2.32 |
| HOR 11503 | Spring type | Landrace | Italy | [10.25642/IPK/GBIS/41527](https://doi.org/10.25642/IPK/GBIS/41527) | 2.67 |
| HOR 11517 | Spring type | Landrace | Uzbekistan | [10.25642/IPK/GBIS/70284](https://doi.org/10.25642/IPK/GBIS/70284) | 2.78 |
| HOR 1158 | Spring type | Landrace | Greece | [10.25642/IPK/GBIS/17356](https://doi.org/10.25642/IPK/GBIS/17356) | 1.08 |
| HOR 1176 | Spring type | Landrace | Turkey | [10.25642/IPK/GBIS/17374](https://doi.org/10.25642/IPK/GBIS/17374) | 0.49 |
| HOR 12058 | Spring type | Cultivar | Colombia | [10.25642/IPK/GBIS/86526](https://doi.org/10.25642/IPK/GBIS/86526) | 3.27 |
| HOR 1234 | Spring type | Landrace | Greece | [10.25642/IPK/GBIS/17429](https://doi.org/10.25642/IPK/GBIS/17429) | 1.91 |
| HOR 12402 | Spring type | Landrace | Albania | [10.25642/IPK/GBIS/92317](https://doi.org/10.25642/IPK/GBIS/92317) | 2.29 |
| HOR 12423 | Spring type | Landrace | Italy | [10.25642/IPK/GBIS/25326](https://doi.org/10.25642/IPK/GBIS/25326) | 2.55 |
| HOR 12522 | Spring type | Landrace | Morocco | [10.25642/IPK/GBIS/92723](https://doi.org/10.25642/IPK/GBIS/92723) | 3.33 |
| HOR 1267 | Spring type | Landrace | Greece | [10.25642/IPK/GBIS/17461](https://doi.org/10.25642/IPK/GBIS/17461) | 2.11 |
| HOR 12711 | Spring type | Landrace | Italy | [10.25642/IPK/GBIS/55207](https://doi.org/10.25642/IPK/GBIS/55207) | 1.73 |
| HOR 12777 | Spring type | Cultivar | ----- | [10.25642/IPK/GBIS/90363](https://doi.org/10.25642/IPK/GBIS/90363) | 3.02 |
| HOR 12783 | Spring type | Landrace | Tunisia | [10.25642/IPK/GBIS/56009](https://doi.org/10.25642/IPK/GBIS/56009) | 2.77 |
| HOR 12788 | Spring type | Landrace | Japan | [10.25642/IPK/GBIS/74809](https://doi.org/10.25642/IPK/GBIS/74809) | 2.26 |
| HOR 12789 | Spring type | Landrace | Tunisia | [10.25642/IPK/GBIS/55744](https://doi.org/10.25642/IPK/GBIS/55744) | 2.84 |
| HOR 12790 | Spring type | Landrace | Tunisia | [10.25642/IPK/GBIS/55746](https://doi.org/10.25642/IPK/GBIS/55746) | 2.07 |
| HOR 12791 | Spring type | Landrace | Italy | [10.25642/IPK/GBIS/59529](https://doi.org/10.25642/IPK/GBIS/59529) | 2.31 |
| HOR 12796 | Spring type | Landrace | China | [10.25642/IPK/GBIS/88717](https://doi.org/10.25642/IPK/GBIS/88717) | 1.92 |
| HOR 12822 | Spring type | Landrace | Italy | [10.25642/IPK/GBIS/73766](https://doi.org/10.25642/IPK/GBIS/73766) | 2.62 |
| HOR 12828 | Spring type | Landrace | Syria | [10.25642/IPK/GBIS/93771](https://doi.org/10.25642/IPK/GBIS/93771) | 2.12 |
| HOR 1284 | Spring type | Landrace | Greece | [10.25642/IPK/GBIS/17477](https://doi.org/10.25642/IPK/GBIS/17477) | 3.25 |
| HOR 13153 | Spring type | Landrace | Italy | [10.25642/IPK/GBIS/94123](https://doi.org/10.25642/IPK/GBIS/94123) | 1.86 |
| HOR 13160 | Spring type | Landrace | Morocco | [10.25642/IPK/GBIS/97828](https://doi.org/10.25642/IPK/GBIS/97828) | 2.93 |
| HOR 133 | Spring type | Landrace | Greece | [10.25642/IPK/GBIS/16391](https://doi.org/10.25642/IPK/GBIS/16391) | 0.13 |
| HOR 13412 | Spring type | Landrace | Morocco | [10.25642/IPK/GBIS/99055](https://doi.org/10.25642/IPK/GBIS/99055) | 2.27 |
| HOR 13421 | Spring type | Landrace | Morocco | [10.25642/IPK/GBIS/99064](https://doi.org/10.25642/IPK/GBIS/99064) | 2.67 |
| HOR 13425 | Spring type | Landrace | Morocco | [10.25642/IPK/GBIS/99068](https://doi.org/10.25642/IPK/GBIS/99068) | 1.88 |
| HOR 13426 | Spring type | Landrace | Morocco | [10.25642/IPK/GBIS/99069](https://doi.org/10.25642/IPK/GBIS/99069) | 2.25 |
| HOR 13428 | Spring type | Landrace | Morocco | [10.25642/IPK/GBIS/99071](https://doi.org/10.25642/IPK/GBIS/99071) | 2.92 |
| HOR 13430 | Spring type | Landrace | Morocco | [10.25642/IPK/GBIS/99073](https://doi.org/10.25642/IPK/GBIS/99073) | 2.52 |
| HOR 13431 | Spring type | Landrace | Morocco | [10.25642/IPK/GBIS/99074](https://doi.org/10.25642/IPK/GBIS/99074) | 2.67 |
| HOR 13436 | Spring type | Landrace | Morocco | [10.25642/IPK/GBIS/99118](https://doi.org/10.25642/IPK/GBIS/99118) | 2.10 |
| HOR 13439 | Spring type | Landrace | Morocco | [10.25642/IPK/GBIS/99081](https://doi.org/10.25642/IPK/GBIS/99081) | 2.15 |
| HOR 13441 | Spring type | Landrace | Morocco | [10.25642/IPK/GBIS/99083](https://doi.org/10.25642/IPK/GBIS/99083) | 2.65 |
| HOR 13443 | Spring type | Landrace | Morocco | [10.25642/IPK/GBIS/99085](https://doi.org/10.25642/IPK/GBIS/99085) | 1.99 |
| HOR 13445 | Spring type | Landrace | Morocco | [10.25642/IPK/GBIS/99087](https://doi.org/10.25642/IPK/GBIS/99087) | 1.68 |
| HOR 13466 | Spring type | Landrace | Italy | [10.25642/IPK/GBIS/95560](https://doi.org/10.25642/IPK/GBIS/95560) | 1.48 |
| HOR 13716 | Spring type | Landrace | India | [10.25642/IPK/GBIS/224818](https://doi.org/10.25642/IPK/GBIS/224818) | 0.15 |
| HOR 13724 | Spring type | Landrace | India | [10.25642/IPK/GBIS/253893](https://doi.org/10.25642/IPK/GBIS/253893) | 0.09 |
| HOR 13731 | Spring type | Landrace | India | [10.25642/IPK/GBIS/233269](https://doi.org/10.25642/IPK/GBIS/233269) | 1.75 |
| HOR 13807 | Spring type | Landrace | Russia | [10.25642/IPK/GBIS/224854](https://doi.org/10.25642/IPK/GBIS/224854) | 2.05 |
| HOR 13869 | Spring type | Landrace | Morocco | [10.25642/IPK/GBIS/249528](https://doi.org/10.25642/IPK/GBIS/249528) | 1.85 |
| HOR 13870 | Spring type | Landrace | Iran | [10.25642/IPK/GBIS/252021](https://doi.org/10.25642/IPK/GBIS/252021) | 2.73 |
| HOR 13888 | Spring type | Landrace | Spain | [10.25642/IPK/GBIS/260362](https://doi.org/10.25642/IPK/GBIS/260362) | 0.69 |
| HOR 13940 | Spring type | Landrace | Spain | [10.25642/IPK/GBIS/260353](https://doi.org/10.25642/IPK/GBIS/260353) | 2.30 |
| HOR 13945 | Spring type | Landrace | Spain | [10.25642/IPK/GBIS/233290](https://doi.org/10.25642/IPK/GBIS/233290) | 2.17 |
| HOR 13962 | Spring type | Landrace | India | [10.25642/IPK/GBIS/228473](https://doi.org/10.25642/IPK/GBIS/228473) | 0.25 |
| HOR 1398 | Spring type | Landrace | Turkey | [10.25642/IPK/GBIS/17563](https://doi.org/10.25642/IPK/GBIS/17563) | 2.08 |
| HOR 13983 | Spring type | Landrace | Iran | [10.25642/IPK/GBIS/252013](https://doi.org/10.25642/IPK/GBIS/252013) | 2.04 |
| HOR 13987 | Spring type | Landrace | Ethiopia | [10.25642/IPK/GBIS/228463](https://doi.org/10.25642/IPK/GBIS/228463) | 2.06 |
| HOR 14096 | Spring type | Breeding | Israel | [10.25642/IPK/GBIS/228460](https://doi.org/10.25642/IPK/GBIS/228460) | 3.03 |
| HOR 14156 | Spring type | Landrace | Spain | [10.25642/IPK/GBIS/251703](https://doi.org/10.25642/IPK/GBIS/251703) | 8.66 |
| HOR 14196 | Spring type | Landrace | ----- | [10.25642/IPK/GBIS/251642](https://doi.org/10.25642/IPK/GBIS/251642) | 4.03 |
| HOR 14216 | Spring type | Landrace | Pakistan | [10.25642/IPK/GBIS/262246](https://doi.org/10.25642/IPK/GBIS/262246) | 0.84 |
| HOR 14221 | Spring type | Landrace | Norway | [10.25642/IPK/GBIS/235768](https://doi.org/10.25642/IPK/GBIS/235768) | 2.47 |
| HOR 14334 | Spring type | Landrace | Afghanistan | [10.25642/IPK/GBIS/260388](https://doi.org/10.25642/IPK/GBIS/260388) | 1.75 |
| HOR 14342 | Spring type | Landrace | Afghanistan | [10.25642/IPK/GBIS/224856](https://doi.org/10.25642/IPK/GBIS/224856) | 2.76 |
| HOR 14376 | Spring type | Cultivar | ----- | [10.25642/IPK/GBIS/224076](https://doi.org/10.25642/IPK/GBIS/224076) | 4.06 |
| HOR 14382 | Spring type | Landrace | Spain | [10.25642/IPK/GBIS/251673](https://doi.org/10.25642/IPK/GBIS/251673) | 6.16 |
| HOR 14443 | Spring type | Landrace | Iran | [10.25642/IPK/GBIS/224061](https://doi.org/10.25642/IPK/GBIS/224061) | 2.20 |
| HOR 14450 | Spring type | Breeding | ----- | [10.25642/IPK/GBIS/251714](https://doi.org/10.25642/IPK/GBIS/251714) | 2.32 |
| HOR 14451 | Spring type | Cultivar | ----- | [10.25642/IPK/GBIS/262252](https://doi.org/10.25642/IPK/GBIS/262252) | 3.03 |
| HOR 14463 | Spring type | Cultivar | ----- | [10.25642/IPK/GBIS/251712](https://doi.org/10.25642/IPK/GBIS/251712) | 3.30 |
| HOR 14476 | Spring type | Landrace | Spain | [10.25642/IPK/GBIS/251660](https://doi.org/10.25642/IPK/GBIS/251660) | 1.97 |
| HOR 14479 | Spring type | Breeding | ----- | [10.25642/IPK/GBIS/244889](https://doi.org/10.25642/IPK/GBIS/244889) | 2.20 |
| HOR 14480 | Spring type | Breeding | ----- | [10.25642/IPK/GBIS/243959](https://doi.org/10.25642/IPK/GBIS/243959) | 1.99 |
| HOR 14730 | Spring type | Landrace | Ethiopia | [10.25642/IPK/GBIS/245717](https://doi.org/10.25642/IPK/GBIS/245717) | 2.60 |
| HOR 14776 | Spring type | Landrace | Canada | [10.25642/IPK/GBIS/244312](https://doi.org/10.25642/IPK/GBIS/244312) | 1.99 |
| HOR 14909 | Spring type | Landrace | Nepal | [10.25642/IPK/GBIS/257156](https://doi.org/10.25642/IPK/GBIS/257156) | 3.45 |
| HOR 14943 | Spring type | Landrace | Nepal | [10.25642/IPK/GBIS/256814](https://doi.org/10.25642/IPK/GBIS/256814) | 2.35 |
| HOR 15119 | Spring type | Cultivar | Germany | [10.25642/IPK/GBIS/226157](https://doi.org/10.25642/IPK/GBIS/226157) | 2.71 |
| HOR 15224 | Spring type | Landrace | Ethiopia | [10.25642/IPK/GBIS/245934](https://doi.org/10.25642/IPK/GBIS/245934) | 1.82 |
| HOR 15238 | Spring type | Landrace | Iran | [10.25642/IPK/GBIS/244129](https://doi.org/10.25642/IPK/GBIS/244129) | 0.09 |
| HOR 15384 | Spring type | Landrace | China | [10.25642/IPK/GBIS/246047](https://doi.org/10.25642/IPK/GBIS/246047) | 0.08 |
| HOR 15401 | Spring type | Landrace | Pakistan | [10.25642/IPK/GBIS/246360](https://doi.org/10.25642/IPK/GBIS/246360) | 2.28 |
| HOR 15412 | Spring type | Landrace | Pakistan | [10.25642/IPK/GBIS/246622](https://doi.org/10.25642/IPK/GBIS/246622) | 2.95 |
| HOR 15423 | Spring type | Landrace | Pakistan | [10.25642/IPK/GBIS/254613](https://doi.org/10.25642/IPK/GBIS/254613) | 1.20 |
| HOR 15553 | Spring type | Landrace | Turkey | [10.25642/IPK/GBIS/258891](https://doi.org/10.25642/IPK/GBIS/258891) | 3.09 |
| HOR 15562 | Spring type | Landrace | Pakistan | [10.25642/IPK/GBIS/246663](https://doi.org/10.25642/IPK/GBIS/246663) | 2.08 |
| HOR 15644 | Spring type | Landrace | Greece | [10.25642/IPK/GBIS/261801](https://doi.org/10.25642/IPK/GBIS/261801) | 2.61 |
| HOR 15675 | Spring type | Landrace | Canada | [10.25642/IPK/GBIS/231410](https://doi.org/10.25642/IPK/GBIS/231410) | 2.76 |
| HOR 15699 | Spring type | Landrace | Greece | [10.25642/IPK/GBIS/261817](https://doi.org/10.25642/IPK/GBIS/261817) | 2.05 |
| HOR 15708 | Spring type | Landrace | Romania | [10.25642/IPK/GBIS/246029](https://doi.org/10.25642/IPK/GBIS/246029) | 2.28 |
| HOR 15735 | Spring type | Landrace | India | [10.25642/IPK/GBIS/257321](https://doi.org/10.25642/IPK/GBIS/257321) | 2.84 |
| HOR 15738 | Spring type | Landrace | India | [10.25642/IPK/GBIS/235630](https://doi.org/10.25642/IPK/GBIS/235630) | 2.91 |
| HOR 15778 | Spring type | Landrace | Afghanistan | [10.25642/IPK/GBIS/234823](https://doi.org/10.25642/IPK/GBIS/234823) | 2.57 |
| HOR 15794 | Spring type | Landrace | Pakistan | [10.25642/IPK/GBIS/254600](https://doi.org/10.25642/IPK/GBIS/254600) | 2.13 |
| HOR 15860 | Spring type | Landrace | Pakistan | [10.25642/IPK/GBIS/234822](https://doi.org/10.25642/IPK/GBIS/234822) | 2.49 |
| HOR 15890 | Spring type | Landrace | Afghanistan | [10.25642/IPK/GBIS/246347](https://doi.org/10.25642/IPK/GBIS/246347) | 2.74 |
| HOR 15894 | Spring type | Landrace | Switzerland | [10.25642/IPK/GBIS/234745](https://doi.org/10.25642/IPK/GBIS/234745) | 2.61 |
| HOR 15895 | Spring type | Landrace | USA | [10.25642/IPK/GBIS/231281](https://doi.org/10.25642/IPK/GBIS/231281) | 2.28 |
| HOR 15920 | Spring type | Landrace | ----- | [10.25642/IPK/GBIS/234746](https://doi.org/10.25642/IPK/GBIS/234746) | 1.44 |
| HOR 15933 | Spring type | Landrace | Spain | [10.25642/IPK/GBIS/258853](https://doi.org/10.25642/IPK/GBIS/258853) | 3.37 |
| HOR 16078 | Spring type | Landrace | Afghanistan | [10.25642/IPK/GBIS/226524](https://doi.org/10.25642/IPK/GBIS/226524) | 0.81 |
| HOR 16087 | Spring type | Landrace | Israel | [10.25642/IPK/GBIS/259209](https://doi.org/10.25642/IPK/GBIS/259209) | 2.17 |
| HOR 16261 | Spring type | Landrace | India | [10.25642/IPK/GBIS/235734](https://doi.org/10.25642/IPK/GBIS/235734) | 2.93 |
| HOR 16569 | Spring type | Landrace | India | [10.25642/IPK/GBIS/229262](https://doi.org/10.25642/IPK/GBIS/229262) | 0.06 |
| HOR 16935 | Spring type | Landrace | India | [10.25642/IPK/GBIS/240712](https://doi.org/10.25642/IPK/GBIS/240712) | 1.42 |
| HOR 17209 | Spring type | Landrace | India | [10.25642/IPK/GBIS/234743](https://doi.org/10.25642/IPK/GBIS/234743) | ≤LLOQ |
| HOR 17245 | Spring type | Landrace | ----- | [10.25642/IPK/GBIS/261826](https://doi.org/10.25642/IPK/GBIS/261826) | 1.92 |
| HOR 17386 | Spring type | Landrace | Nepal | [10.25642/IPK/GBIS/231286](https://doi.org/10.25642/IPK/GBIS/231286) | 3.82 |
| HOR 17512 | Spring type | Landrace | ----- | [10.25642/IPK/GBIS/224444](https://doi.org/10.25642/IPK/GBIS/224444) | 3.24 |
| HOR 17654 | Spring type | Cultivar | ----- | [10.25642/IPK/GBIS/253694](https://doi.org/10.25642/IPK/GBIS/253694) | 1.47 |
| HOR 17705 | Spring type | Landrace | ----- | [10.25642/IPK/GBIS/245239](https://doi.org/10.25642/IPK/GBIS/245239) | 0.11 |
| HOR 17713 | Spring type | Landrace | Afghanistan | [10.25642/IPK/GBIS/246975](https://doi.org/10.25642/IPK/GBIS/246975) | 3.19 |
| HOR 1780 | Spring type | Landrace | Iran | [10.25642/IPK/GBIS/17919](https://doi.org/10.25642/IPK/GBIS/17919) | 2.34 |
| HOR 17811 | Spring type | Landrace | China | [10.25642/IPK/GBIS/234749](https://doi.org/10.25642/IPK/GBIS/234749) | 0.09 |
| HOR 17832 | Spring type | Landrace | Afghanistan | [10.25642/IPK/GBIS/234832](https://doi.org/10.25642/IPK/GBIS/234832) | 3.05 |
| HOR 17839 | Spring type | Landrace | China | [10.25642/IPK/GBIS/246021](https://doi.org/10.25642/IPK/GBIS/246021) | 0.07 |
| HOR 18267 | Spring type | Landrace | Greece | [10.25642/IPK/GBIS/231432](https://doi.org/10.25642/IPK/GBIS/231432) | 2.27 |
| HOR 18385 | Spring type | Cultivar | Mexico | [10.25642/IPK/GBIS/246984](https://doi.org/10.25642/IPK/GBIS/246984) | 0.60 |
| HOR 1860 | Spring type | Landrace | Greece | [10.25642/IPK/GBIS/17999](https://doi.org/10.25642/IPK/GBIS/17999) | 2.19 |
| HOR 18917 | Spring type | Landrace | ----- | [10.25642/IPK/GBIS/234512](https://doi.org/10.25642/IPK/GBIS/234512) | 0.56 |
| HOR 18920 | Spring type | Landrace | Germany | [10.25642/IPK/GBIS/240891](https://doi.org/10.25642/IPK/GBIS/240891) | 2.61 |
| HOR 19168 | Spring type | Landrace | India | [10.25642/IPK/GBIS/234922](https://doi.org/10.25642/IPK/GBIS/234922) | 3.27 |
| HOR 1954 | Spring type | Landrace | Turkey | [10.25642/IPK/GBIS/18077](https://doi.org/10.25642/IPK/GBIS/18077) | 1.76 |
| HOR 19581 | Spring type | Landrace | Ethiopia | [10.25642/IPK/GBIS/258862](https://doi.org/10.25642/IPK/GBIS/258862) | 0.15 |
| HOR 1972 | Spring type | Landrace | Turkey | [10.25642/IPK/GBIS/18093](https://doi.org/10.25642/IPK/GBIS/18093) | 2.32 |
| HOR 1977 | Spring type | Landrace | ----- | [10.25642/IPK/GBIS/18098](https://doi.org/10.25642/IPK/GBIS/18098) | 2.51 |
| HOR 19776 | Spring type | Cultivar | Japan | [10.25642/IPK/GBIS/248633](https://doi.org/10.25642/IPK/GBIS/248633) | 3.28 |
| HOR 199 | Spring type | Landrace | Russia | [10.25642/IPK/GBIS/16455](https://doi.org/10.25642/IPK/GBIS/16455) | 2.13 |
| HOR 2004 | Spring type | Landrace | Italy | [10.25642/IPK/GBIS/78598](https://doi.org/10.25642/IPK/GBIS/78598) | 3.09 |
| HOR 2024 | Spring type | Cultivar | Japan | [10.25642/IPK/GBIS/18139](https://doi.org/10.25642/IPK/GBIS/18139) | 2.42 |
| HOR 20710 | Spring type | Landrace | Iran | [10.25642/IPK/GBIS/261822](https://doi.org/10.25642/IPK/GBIS/261822) | 1.88 |
| HOR 20714 | Spring type | Landrace | Russia | [10.25642/IPK/GBIS/261789](https://doi.org/10.25642/IPK/GBIS/261789) | 2.16 |
| HOR 21087 | Spring type | Landrace | ----- | [10.25642/IPK/GBIS/248320](https://doi.org/10.25642/IPK/GBIS/248320) | 2.72 |
| HOR 21250 | Spring type | Landrace | Iran | [10.25642/IPK/GBIS/235408](https://doi.org/10.25642/IPK/GBIS/235408) | 2.34 |
| HOR 21344 | Spring type | Landrace | Iran | [10.25642/IPK/GBIS/254410](https://doi.org/10.25642/IPK/GBIS/254410) | 1.51 |
| HOR 21436 | Spring type | Landrace | Iran | [10.25642/IPK/GBIS/248303](https://doi.org/10.25642/IPK/GBIS/248303) | 1.92 |
| HOR 21439 | Spring type | Landrace | Iran | [10.25642/IPK/GBIS/256762](https://doi.org/10.25642/IPK/GBIS/256762) | 1.23 |
| HOR 21641 | Spring type | Landrace | Chad | [10.25642/IPK/GBIS/252489](https://doi.org/10.25642/IPK/GBIS/252489) | 2.56 |
| HOR 2366 | Spring type | Cultivar | China | [10.25642/IPK/GBIS/18431](https://doi.org/10.25642/IPK/GBIS/18431) | ≤LLOQ |
| HOR 2367 | Spring type | Cultivar | China | [10.25642/IPK/GBIS/18432](https://doi.org/10.25642/IPK/GBIS/18432) | 0.13 |
| HOR 2369 | Spring type | Cultivar | China | [10.25642/IPK/GBIS/18434](https://doi.org/10.25642/IPK/GBIS/18434) | ≤LLOQ |
| HOR 2383 | Spring type | Landrace | China | [10.25642/IPK/GBIS/18448](https://doi.org/10.25642/IPK/GBIS/18448) | ≤LLOQ |
| HOR 2403 | Spring type | Cultivar | Canada | [10.25642/IPK/GBIS/18464](https://doi.org/10.25642/IPK/GBIS/18464) | 2.05 |
| HOR 2503 | Spring type | Landrace | China | [10.25642/IPK/GBIS/18539](https://doi.org/10.25642/IPK/GBIS/18539) | 0.11 |
| HOR 264 | Spring type | Cultivar | USA | [10.25642/IPK/GBIS/16515](https://doi.org/10.25642/IPK/GBIS/16515) | 2.43 |
| HOR 2747 | Spring type | Cultivar | USA | [10.25642/IPK/GBIS/18775](https://doi.org/10.25642/IPK/GBIS/18775) | 2.45 |
| HOR 2799 | Spring type | Landrace | Iran | [10.25642/IPK/GBIS/18827](https://doi.org/10.25642/IPK/GBIS/18827) | 0.13 |
| HOR 2860 | Spring type | Landrace | Iran | [10.25642/IPK/GBIS/18887](https://doi.org/10.25642/IPK/GBIS/18887) | 2.26 |
| HOR 3272 | Spring type | Cultivar | India | [10.25642/IPK/GBIS/19273](https://doi.org/10.25642/IPK/GBIS/19273) | 2.72 |
| HOR 3661 | Spring type | Landrace | ----- | [10.25642/IPK/GBIS/19655](https://doi.org/10.25642/IPK/GBIS/19655) | 1.38 |
| HOR 4018 | Spring type | Cultivar | USA | [10.25642/IPK/GBIS/19994](https://doi.org/10.25642/IPK/GBIS/19994) | 2.20 |
| HOR 4058 | Spring type | Landrace | Mongolia | [10.25642/IPK/GBIS/20031](https://doi.org/10.25642/IPK/GBIS/20031) | 0.12 |
| HOR 4061 | Spring type | Cultivar | China | [10.25642/IPK/GBIS/20034](https://doi.org/10.25642/IPK/GBIS/20034) | 1.65 |
| HOR 4065 | Spring type | Cultivar | USA | [10.25642/IPK/GBIS/20038](https://doi.org/10.25642/IPK/GBIS/20038) | 1.96 |
| HOR 4091 | Spring type | Landrace | Mongolia | [10.25642/IPK/GBIS/20064](https://doi.org/10.25642/IPK/GBIS/20064) | ≤LLOQ |
| HOR 4421 | Spring type | Landrace | Mongolia | [10.25642/IPK/GBIS/20386](https://doi.org/10.25642/IPK/GBIS/20386) | 1.84 |
| HOR 448 | Spring type | Landrace | Turkey | [10.25642/IPK/GBIS/16676](https://doi.org/10.25642/IPK/GBIS/16676) | 3.12 |
| HOR 4588 | Spring type | Landrace | Mongolia | [10.25642/IPK/GBIS/20550](https://doi.org/10.25642/IPK/GBIS/20550) | ≤LLOQ |
| HOR 473 | Spring type | Landrace | Turkey | [10.25642/IPK/GBIS/16700](https://doi.org/10.25642/IPK/GBIS/16700) | 1.36 |
| HOR 4815 | Spring type | Landrace | Denmark | [10.25642/IPK/GBIS/20748](https://doi.org/10.25642/IPK/GBIS/20748) | 0.09 |
| HOR 5185 | Spring type | Landrace | Ethiopia | [10.25642/IPK/GBIS/21095](https://doi.org/10.25642/IPK/GBIS/21095) | 0.12 |
| HOR 5220 | Spring type | Landrace | Ethiopia | [10.25642/IPK/GBIS/21130](https://doi.org/10.25642/IPK/GBIS/21130) | 3.82 |
| HOR 528 | Spring type | Landrace | Turkey | [10.25642/IPK/GBIS/16754](https://doi.org/10.25642/IPK/GBIS/16754) | 3.26 |
| HOR 534 | Spring type | Landrace | Turkey | [10.25642/IPK/GBIS/16760](https://doi.org/10.25642/IPK/GBIS/16760) | 2.02 |
| HOR 567 | Spring type | Landrace | Turkey | [10.25642/IPK/GBIS/16793](https://doi.org/10.25642/IPK/GBIS/16793) | 2.12 |
| HOR 5876 | Spring type | Landrace | Ethiopia | [10.25642/IPK/GBIS/21786](https://doi.org/10.25642/IPK/GBIS/21786) | 2.10 |
| HOR 6908 | Spring type | Landrace | Ethiopia | [10.25642/IPK/GBIS/22815](https://doi.org/10.25642/IPK/GBIS/22815) | 2.12 |
| HOR 693 | Spring type | Landrace | Greece | [10.25642/IPK/GBIS/16918](https://doi.org/10.25642/IPK/GBIS/16918) | 1.39 |
| HOR 6939 | Spring type | Cultivar | Argentina | [10.25642/IPK/GBIS/26025](https://doi.org/10.25642/IPK/GBIS/26025) | 2.22 |
| HOR 6954 | Spring type | Landrace | Greece | [10.25642/IPK/GBIS/26040](https://doi.org/10.25642/IPK/GBIS/26040) | 2.12 |
| HOR 6962 | Spring type | Cultivar | India | [10.25642/IPK/GBIS/26048](https://doi.org/10.25642/IPK/GBIS/26048) | 2.26 |
| HOR 6999 | Spring type | Landrace | Nepal | [10.25642/IPK/GBIS/26078](https://doi.org/10.25642/IPK/GBIS/26078) | 2.07 |
| HOR 7067 | Spring type | Landrace | Nepal | [10.25642/IPK/GBIS/22900](https://doi.org/10.25642/IPK/GBIS/22900) | 1.95 |
| HOR 7116 | Spring type | Landrace | Nepal | [10.25642/IPK/GBIS/22949](https://doi.org/10.25642/IPK/GBIS/22949) | 3.15 |
| HOR 7134 | Spring type | Landrace | Nepal | [10.25642/IPK/GBIS/22967](https://doi.org/10.25642/IPK/GBIS/22967) | 3.25 |
| HOR 7142 | Spring type | Landrace | Nepal | [10.25642/IPK/GBIS/22975](https://doi.org/10.25642/IPK/GBIS/22975) | 2.65 |
| HOR 7164 | Spring type | Landrace | Nepal | [10.25642/IPK/GBIS/22997](https://doi.org/10.25642/IPK/GBIS/22997) | 3.25 |
| HOR 7171 | Spring type | Landrace | Nepal | [10.25642/IPK/GBIS/23004](https://doi.org/10.25642/IPK/GBIS/23004) | ≤LLOQ |
| HOR 7251 | Spring type | Landrace | India | [10.25642/IPK/GBIS/23076](https://doi.org/10.25642/IPK/GBIS/23076) | 0.11 |
| HOR 7602 | Spring type | Landrace | Pakistan | [10.25642/IPK/GBIS/23405](https://doi.org/10.25642/IPK/GBIS/23405) | ≤LLOQ |
| HOR 7629 | Spring type | Landrace | Pakistan | [10.25642/IPK/GBIS/23428](https://doi.org/10.25642/IPK/GBIS/23428) | 0.14 |
| HOR 7679 | Spring type | Landrace | Pakistan | [10.25642/IPK/GBIS/23464](https://doi.org/10.25642/IPK/GBIS/23464) | 0.10 |
| HOR 7973 | Spring type | Landrace | Turkey | [10.25642/IPK/GBIS/23694](https://doi.org/10.25642/IPK/GBIS/23694) | 2.18 |
| HOR 8338 | Spring type | Landrace | India | [10.25642/IPK/GBIS/24045](https://doi.org/10.25642/IPK/GBIS/24045) | 0.08 |
| HOR 8355 | Spring type | Landrace | India | [10.25642/IPK/GBIS/24062](https://doi.org/10.25642/IPK/GBIS/24062) | 0.14 |
| HOR 8370 | Spring type | Landrace | India | [10.25642/IPK/GBIS/24075](https://doi.org/10.25642/IPK/GBIS/24075) | 0.05 |
| HOR 8391 | Spring type | Landrace | India | [10.25642/IPK/GBIS/24096](https://doi.org/10.25642/IPK/GBIS/24096) | 3.23 |
| HOR 8428 | Spring type | Landrace | India | [10.25642/IPK/GBIS/24133](https://doi.org/10.25642/IPK/GBIS/24133) | 0.18 |
| HOR 8446 | Spring type | Landrace | India | [10.25642/IPK/GBIS/24151](https://doi.org/10.25642/IPK/GBIS/24151) | 2.59 |
| HOR 8454 | Spring type | Landrace | Iraq | [10.25642/IPK/GBIS/24159](https://doi.org/10.25642/IPK/GBIS/24159) | 2.60 |
| HOR 846 | Spring type | Landrace | Greece | [10.25642/IPK/GBIS/17065](https://doi.org/10.25642/IPK/GBIS/17065) | 1.51 |
| HOR 8711 | Spring type | Landrace | Nepal | [10.25642/IPK/GBIS/24409](https://doi.org/10.25642/IPK/GBIS/24409) | 2.73 |
| HOR 8787 | Spring type | Landrace | Nepal | [10.25642/IPK/GBIS/24484](https://doi.org/10.25642/IPK/GBIS/24484) | 2.10 |
| HOR 9043 | Spring type | Landrace | Ethiopia | [10.25642/IPK/GBIS/24724](https://doi.org/10.25642/IPK/GBIS/24724) | 0.14 |
| HOR 924 | Spring type | Landrace | Turkey | [10.25642/IPK/GBIS/17136](https://doi.org/10.25642/IPK/GBIS/17136) | 0.95 |
| HOR 9292 | Spring type | Cultivar | Russia | [10.25642/IPK/GBIS/24961](https://doi.org/10.25642/IPK/GBIS/24961) | 2.29 |
| HOR 9532 | Spring type | Cultivar | USA | [10.25642/IPK/GBIS/25188](https://doi.org/10.25642/IPK/GBIS/25188) | 2.72 |
| HOR 9558 | Spring type | Landrace | China | [10.25642/IPK/GBIS/25214](https://doi.org/10.25642/IPK/GBIS/25214) | 2.48 |
| HOR 9709 | Spring type | Landrace | Italy | [10.25642/IPK/GBIS/79173](https://doi.org/10.25642/IPK/GBIS/79173) | 2.32 |
| HOR 9720 | Spring type | Landrace | Libya | [10.25642/IPK/GBIS/81980](https://doi.org/10.25642/IPK/GBIS/81980) | 2.81 |
| HOR 9876 | Spring type | Landrace | Libya | [10.25642/IPK/GBIS/25521](https://doi.org/10.25642/IPK/GBIS/25521) | 2.95 |
| HOR 9891 | Spring type | Landrace | Libya | [10.25642/IPK/GBIS/25536](https://doi.org/10.25642/IPK/GBIS/25536) | 2.86 |
| HOR 9911 | Spring type | Landrace | Italy | [10.25642/IPK/GBIS/79331](https://doi.org/10.25642/IPK/GBIS/79331) | 2.72 |
| HOR 9930 | Spring type | Landrace | Libya | [10.25642/IPK/GBIS/25574](https://doi.org/10.25642/IPK/GBIS/25574) | 3.28 |

**Fig. S1.** Relationships between seed weight and Si accumulation traits across 251 accessions of the Core1000 barley diversity panel. (**a**) Correlation between seed Si concentration and seed weight. (**b**) Correlation between total seed Si content and seed weight. Each blue dot represents an individual accession. The red dashed line indicates the fitted linear regression model, with the corresponding equation, R2, and *P*-value displayed in each panel.

**
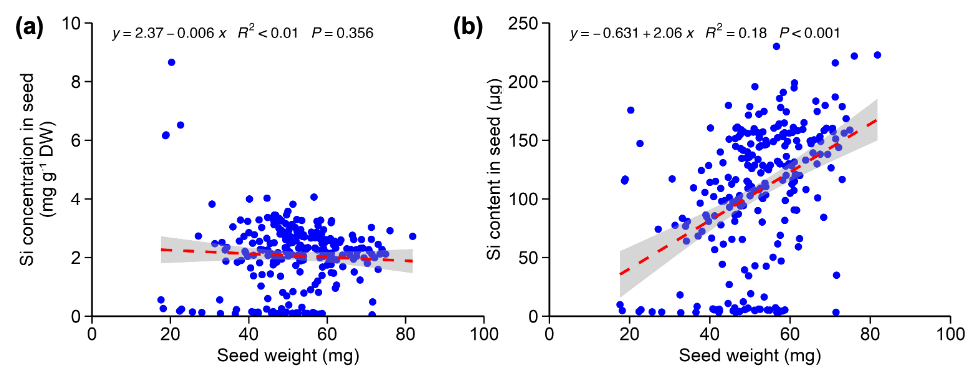
**

**Fig. S2.** Chromosomal localization of the known Si transporters (*Lsi*) of barley and the four identified QTLs from the GWAS analysis.


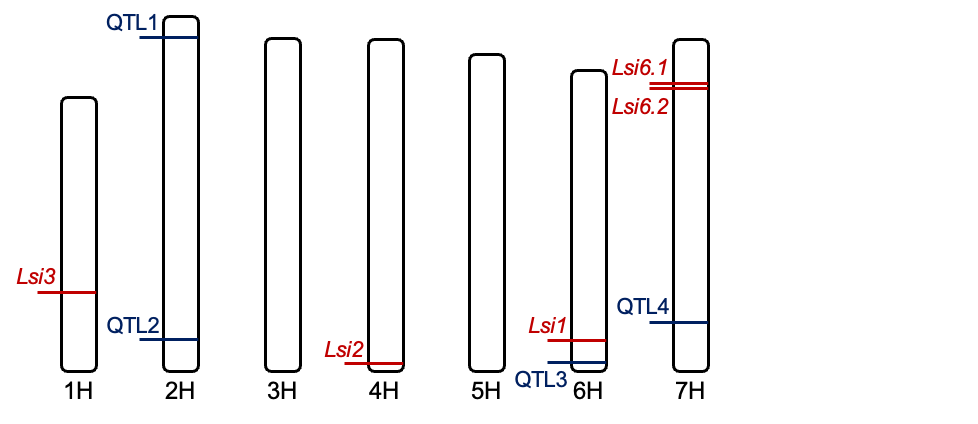

Supplement: Supplementary file 1 [file 462cbe27bb8dc163ad9e41cb.docx]
